# Supplementary material for: HLA-DPA1 gene is a potential predictor with prognostic values in multiple myeloma
Source: Springer Nature journal article supplement (doi:10.1186/s12885-020-07393-0), 2020-09-24
Supplement: MOESM1 [file 18412720]

## HLA-DQA1

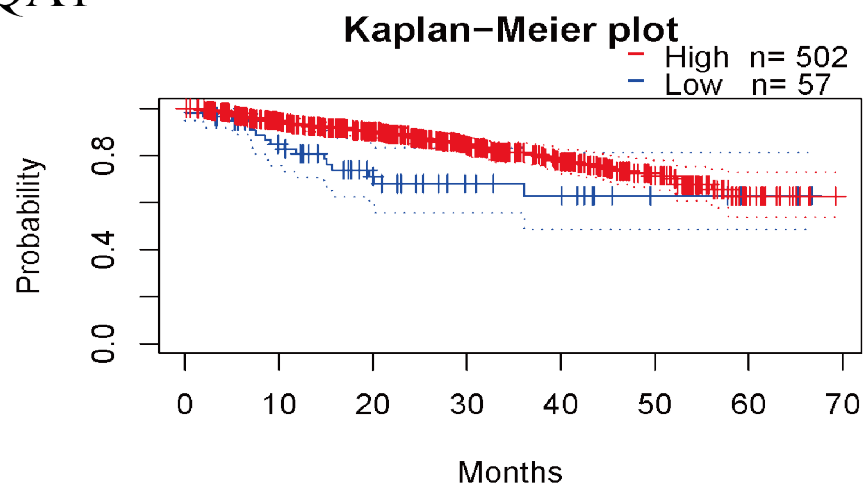

COX  $p=0.126574$   
HR [95% CI]=0.88 [0.76-1.04]

## HLA-DQB1

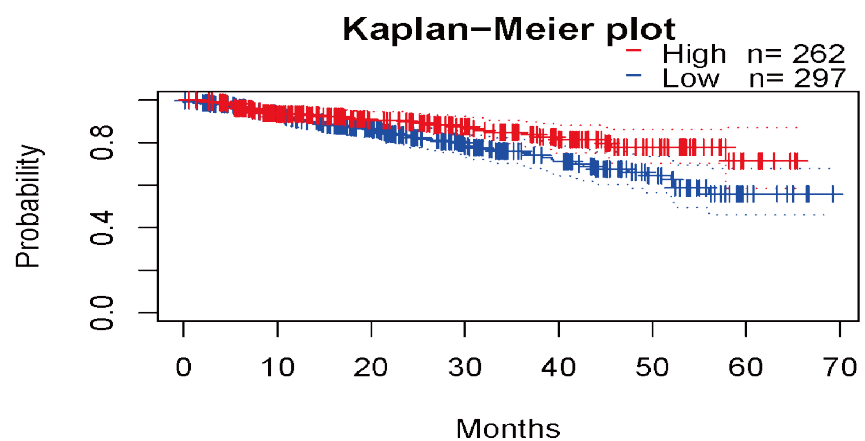

COX  $p=0.079639$   
HR [95% CI]=0.85 [0.71-1.02]
